## CORRECTION

# Correction: Reference rate for post-tonsillectomy haemorrhage in Australia—A 2000–2020 national hospital morbidity database analysis

The *PLOS One* Staff

The caption for [Fig 5](#) has been incorrectly included as main text. Please see the complete, correct [Fig 5](#) caption here.

The ORCID iD is missing for the second author. Please see the author's ORCID iD here:

- Author Martin Forer's ORCID iD is 0000-0001-6283-3970 (<https://orcid.org/0000-0001-6283-3970>).

The publisher apologizes for the errors.

## Reference

1. Li JC, Forer M, Veivers D. Reference rate for post-tonsillectomy haemorrhage in Australia—A 2000–2020 national hospital morbidity database analysis. *PLoS One*. 2022;17(8): e0273320. <https://doi.org/10.1371/journal.pone.0273320> PMID: [36006990](https://pubmed.ncbi.nlm.nih.gov/36006990/)

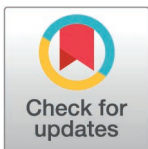

## OPEN ACCESS

**Citation:** The *PLOS One* Staff (2025) Correction: Reference rate for post-tonsillectomy haemorrhage in Australia—A 2000–2020 national hospital morbidity database analysis. *PLoS ONE* 20(3): e0321297. <https://doi.org/10.1371/journal.pone.0321297>

**Published:** March 27, 2025

**Copyright:** © 2025 The *PLOS One* Staff. This is an open access article distributed under the terms of the [Creative Commons Attribution License](https://creativecommons.org/licenses/by/4.0/), which permits unrestricted use, distribution, and reproduction in any medium, provided the original author and source are credited.

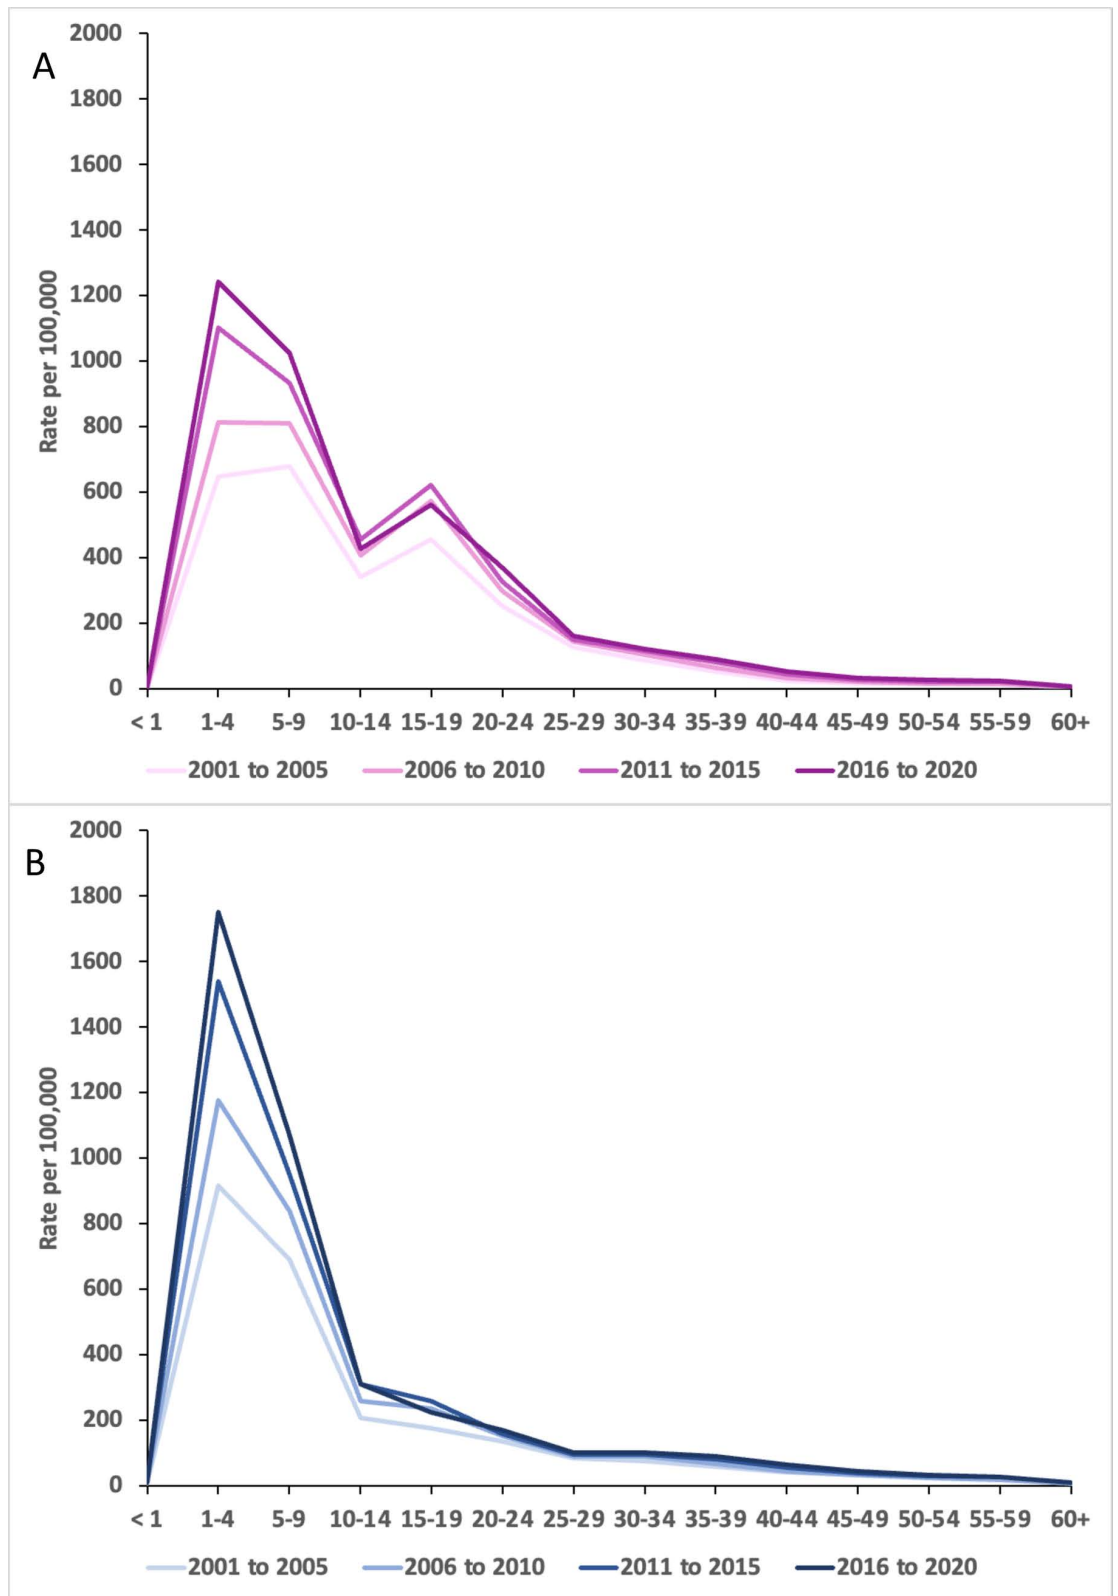

**Fig 5. Age-specific incidence of tonsillectomy procedures for males and females, 2000–01 to 2019–20.** Age-specific incidence rate averaged over 5-year periods from 2000-01 to 2019-20 for females (A) and males (B). Rate expressed in procedures per 100,000 person-years. Data obtained from the National Hospital Morbidity Database.

<https://doi.org/10.1371/journal.pone.0321297.g001>
